# Supplementary material
Source: publisher figshare collection journal article supplement (https://tandf.figshare.com/articles/dataset/_/8490137)
Supplement: Supplementary file 1 [file 2]

# Supplementary Material

## Transition of deformation mechanisms in nanotwinned single crystalline SiC

Saeed Z. Chavoshi<sup>1\*</sup>, Mark A. Tschopp<sup>2</sup>, Paulo S. Branicio<sup>3</sup>

<sup>1</sup>Department of Mechanical Engineering, Imperial College London, London SW7 2AZ, UK

<sup>2</sup>U.S. Army Research Laboratory, Chicago, IL 60615, USA

<sup>3</sup>Mork Family Department of Chemical Engineering and Materials Science, University of Southern California, Los Angeles, California 90089, USA

\*Corresponding author: [s.zare@imperial.ac.uk](mailto:s.zare@imperial.ac.uk)

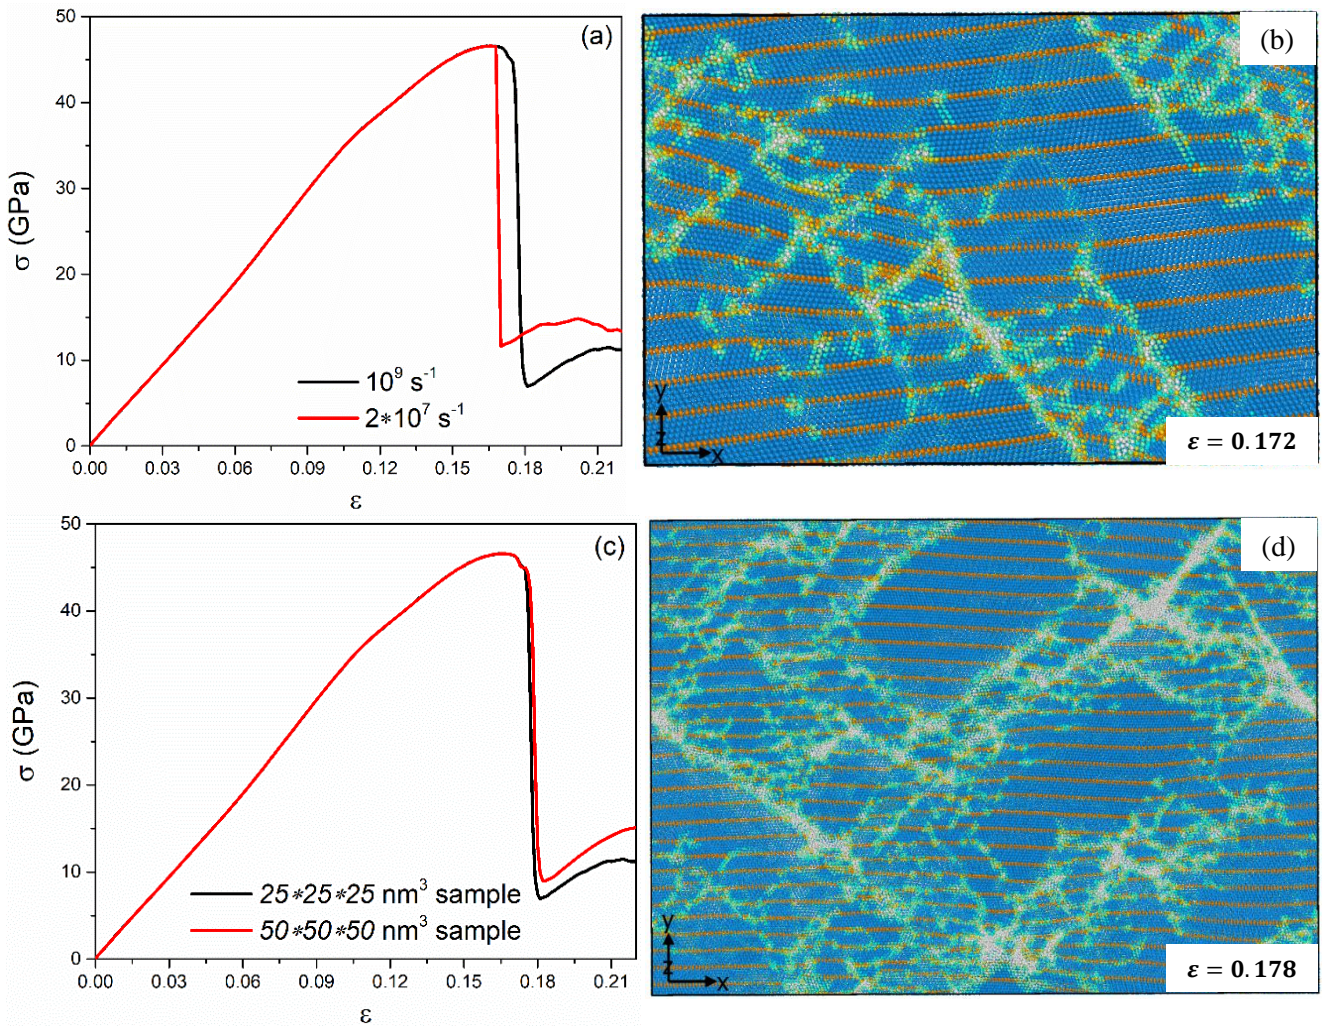

Figure S1 Uniaxial stress-strain and deformation behavior of the nanotwinned single crystalline 3C-SiC ceramic with  $\lambda = 1.5$  nm subjected to compressive stress loading at 300 K, (a-b) Sample with the cubic length size of 25 nm, containing  $\sim 1.5$  million atoms, at two strain rates of  $10^9 \text{ s}^{-1}$  and  $2 \times 10^7 \text{ s}^{-1}$ ; (c-d) Samples with the cubic length size of 25 nm and 50 nm,

containing  $\sim 12$  million atoms, at the strain rate of  $10^9 \text{ s}^{-1}$ . Deformation bands and shear-induced fracture is less pronounced at lower strain rates as well as in the bigger sample, however, the strength is the same.

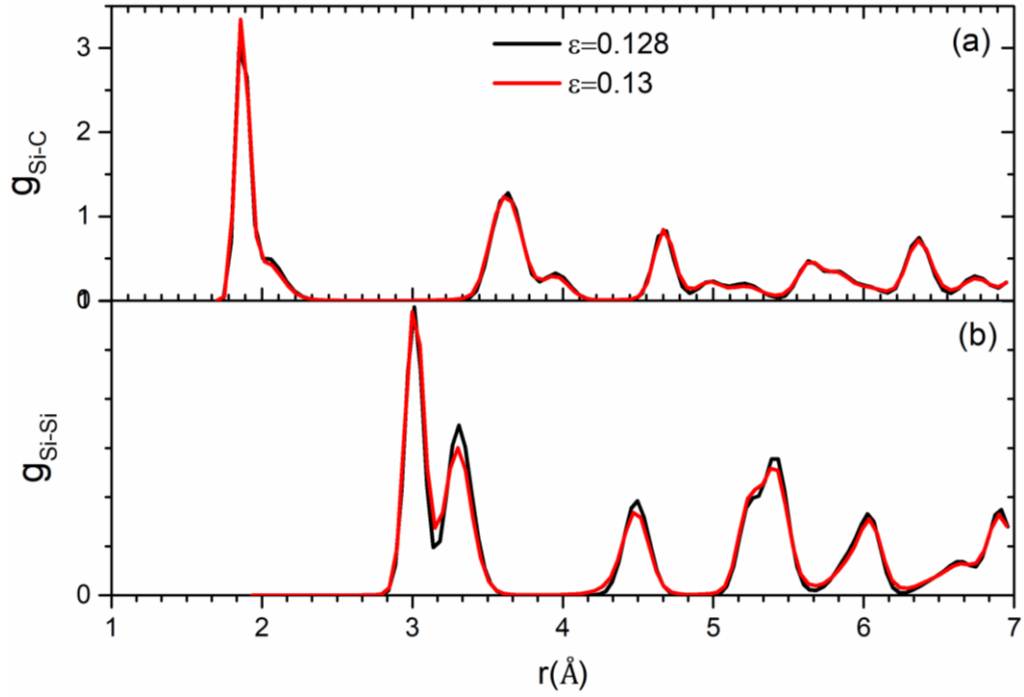

Figure S2 Partial RDF for the nanotwinned sample with  $\lambda = 1.5 \text{ nm}$  during uniaxial tensile loading.
