# Supplementary material
Source: publisher figshare collection journal article supplement (https://tandf.figshare.com/articles/dataset/_/8490137)
Supplement: Supplementary file 2 [file 2]

Archive with 8 entries (8 files):
- tphm_a_1637033_sm7642.pdf
- tphm_a_1637033_sm7730.mp4
- tphm_a_1637033_sm7729.mp4
- tphm_a_1637033_sm7728.mp4
- tphm_a_1637033_sm7727.mp4
- tphm_a_1637033_sm7726.mp4
- tphm_a_1637033_sm7725.mp4
- tphm_a_1637033_sm7724.mp4
